# Supplementary material
Source: Springer Nature journal article supplement (https://www.springermedizin.de/resource/supplementary/12889_2011_3732_MOESM2_ESM.pdf/9489986)
Supplement: MOESM2 [file 9489986]

**a) Distribution of women according to real and self-reported BMI (Validation sample)**

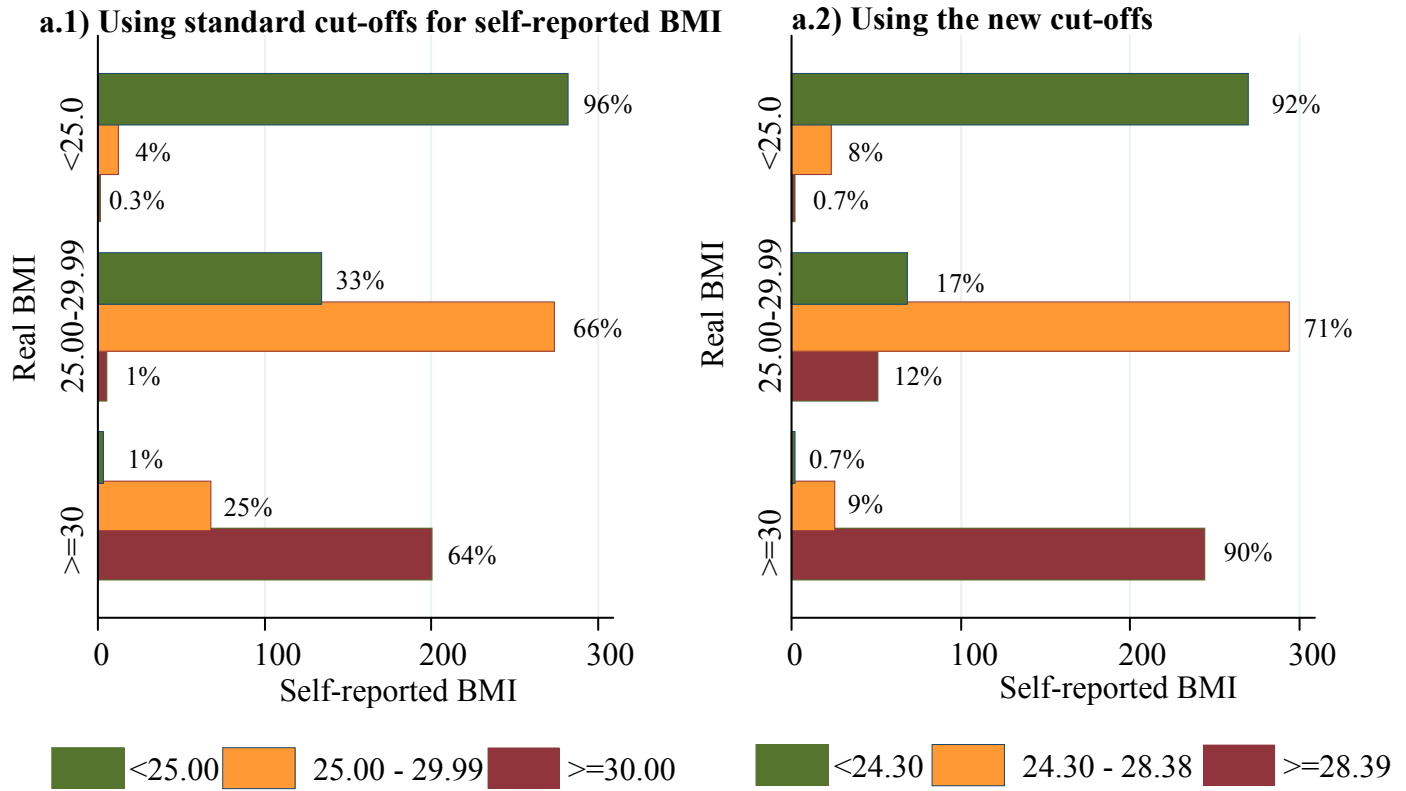

**b) ROC curves for obesity & overweight (Validation sample)**

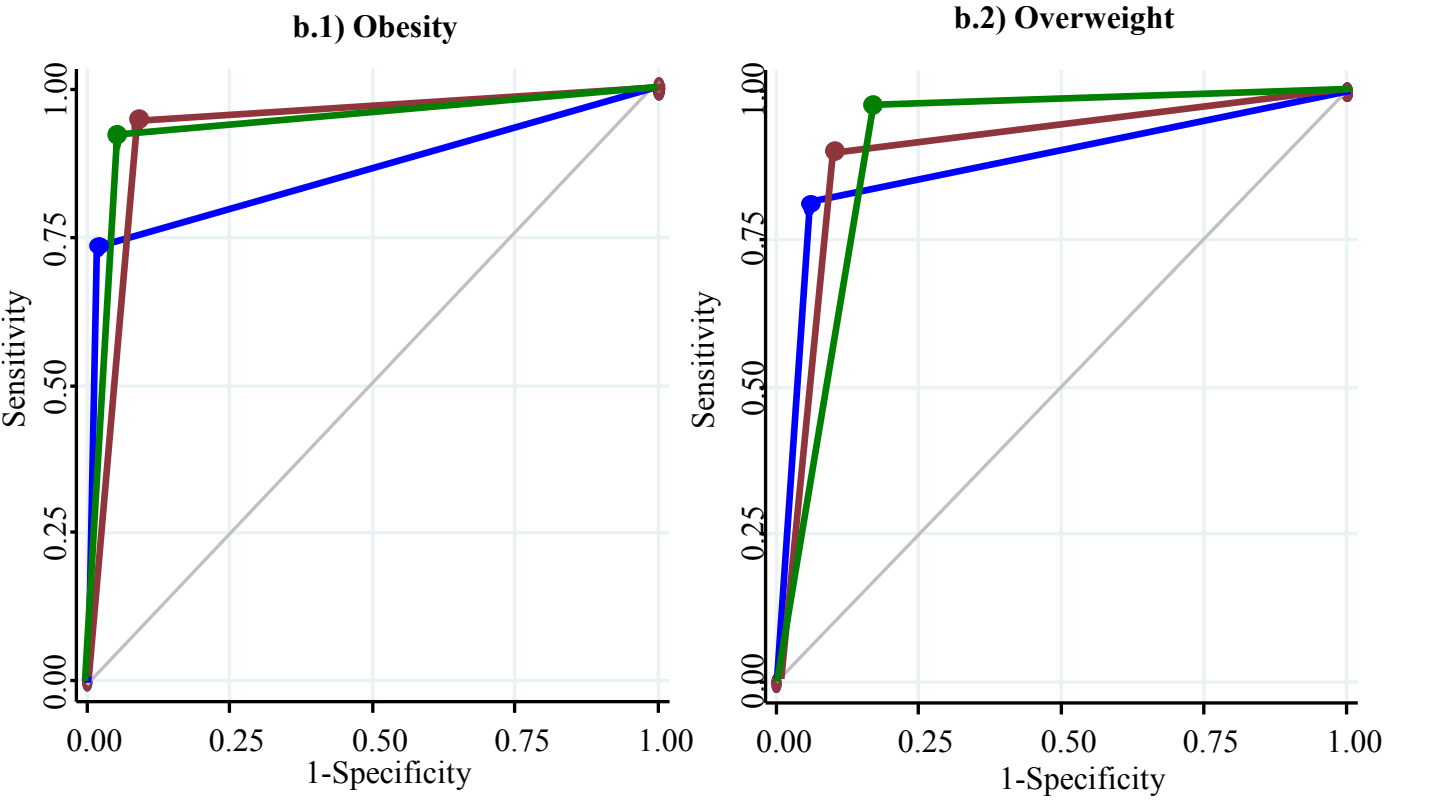

- Self-reported BMI ≥ 30 kg/m<sup>2</sup> (ROC area = 0.867)
- Self-reported BMI ≥ 28.39 kg/m<sup>2</sup> (ROC area = 0.913)
- Predicted BMI (ROC area = 0.915)
- Self-reported BMI ≥ 25 kg/m<sup>2</sup> (ROC area = 0.870)
- Self-reported BMI ≥ 24.30 kg/m<sup>2</sup> (ROC area = 0.910)
- Predicted BMI (ROC area = 0.897)
